# Supplementary material
Source: MDPI journal article supplement (https://www.mdpi.com/2073-4441/11/12/2468)
Supplement: s1 [file s1]

**Dynamics of cyanobacteria and related environmental drivers in freshwater bodies effected by mitten crab culturing: A study of Lake Guchenghu, China**

**Hongmin Li1,2, Huihui Chen1, Xiaohong Gu1*, Zhigang Mao1, Qingfei Zeng1, Huiping Ding1,2**

1. State Key Laboratory of Lake Science and Environment, Nanjing Institute of Geography & Limnology, Chinese Academy of Sciences, Nanjing 210008, China
2. University of Chinese Academy of Sciences, Beijing 100049, China

* Correspondence: xhgu@niglas.ac.cn; Tel.: +0086-25-86882006

## 3.2. Seasonal variations of cyanobacteria

**Table S1.** The list of cyanobacteria species in Lake Guchenghu and adjacent mitten crab ponds (May 2017–February 2018).

| **Genera** | **Species** | **Lake** | **Ponds** | **Genera** | **Species** | **Lake** | **Ponds** |
| --- | --- | --- | --- | --- | --- | --- | --- |
| *Dolichospermum* | *D. eucompacta* |  | + | *Spirulina* | *S. platensis* | + |  |
|  | *D. bergii* | + | + | *Synechecoccus* | *S. sp* | + |  |
|  | *D. planctonica* |  | + | *Synechocystis* | *S. sp* | + | + |
|  | *D. sp1.* |  | + | *Raphidiopsis* | *R. sp1*. | + |  |
|  | *D.viguieri* | + | + | *Romeria* | *R. sp2.* | + | + |
|  | *D. circinale* | + | + |  | *R. raciborskii* |  | + |
|  | *D.sp1.* | + |  |  | *R. sp.* | + |  |
|  | *D. sp3*. | + |  | *Spirulina* | *S. sp.* | + |  |
|  | *D. azotica* | + | + | *Coelosphaerium* | *C. sp.* | + | + |
| *Oscillatoria* | *O. sp1.* | + |  | *Chroococcus* | *C. limneticus* | + | + |
|  | *O. sp2.* | + | + | *C. sp.* | + |  |
|  | *O. sp3.* | + |  | *C. sp1*. | + |  |
|  | *O. fracta* | + |  | *Cuspidothrix* | *C. issatschenkoi* |  | + |
|  | *O. prolifica* | + |  | *Aphanizomenon* | *A.sp1.* | + | + |
|  | *O. rubescens* | + |  |  | *A.sp2.* | + |  |
|  | *O. princeps* | + |  |  | *A.flos-aquae* | + |  |
|  | *O. geminata* | + | + | *Microcystis* | *M. sp.* | + | + |
|  | *O. minima* |  | + |  | *M. sp1.* | + |  |
| *Merismopedia* | *M. punctata* | + | + | *Phormidium* | *P. sp1* | + |  |
|  | *M. marssonii* | + |  |  | *P. tenus* | + |  |
|  | *M. tenuissima* | + | + | *Aphanocapsa* | *A.sp.* | + |  |
|  | *M. minima* | + | + |  | *A. sp1.* | + |  |
| *Planktolyngbya* | *P. limnetica* | + |  |  | *A. delicatissima* | + | + |
|  | *P. circumcreta* | + | + |  | *A. delicatissima* | + |  |
| *Pseudanabaena* | *P. limnetica (Lemm.)Komárek* | + |  |  | *A. elachista* var.conferta | + | + |
|  | *P. sp.* | + | + |  | *A.elachista* var. plandtonica |  | + |
|  | *P. sp1.* | + | + | *Aphanothece* | *A.sp* | + |  |
|  | *P. sp2.* | + | + | *Dactylococcopsis* | *D.rhaphidioides* | + | + |
|  | *P. moniliformis* | + | + |  | *D. acicularis* | + | + |
| *Anabaenopsis* | *A. circularis* |  | + | *Planktothrix* | *P. agardhii* | + |  |

“+” Represent appearances

**Table S2.** Cyanobacteria community metrics (mean ± standard deviation) observed over four study seasons in Lake Guchenghu basin. Values were calculated from all sites for each season

|  | **May** | | **August** | | **November** | | **February** | | |
| --- | --- | --- | --- | --- | --- | --- | --- | --- | --- |
|  | **Lake Ponds** | | **Lake Ponds** | | **Lake Ponds** | | **Lake** | **Ponds** | |
| Taxa richness | 3.5±2.9 | 1.5±0.7 | 10.2±3.7 | 6.3±6.5 | 10.8±2.9 | 11.3±6.3 | 0.57±0.78 |  | 0.75± 0.95 |
| Dominance | 0.93±0.15 | 0.78±0.31 | 0.23 ±0.1 | 0.58±0.19 | 0.27±0.12 | 0.23±0.15 | 0.96±0.05 |  | 0.875±0.25 |
| Shannon Index | 0.18±0.38 | 0.32±0.45 | 1.79±0.43 | 0.89±0.54 | 1.73±0.38 | 1.8±0.72 | 0.06±0.11 |  | 0.173±0.34 |
| Simpson Index | 0.07±0.15 | 0.22±0.31 | 0.76±0.10 | 0.42±0.19 | 0.73±0.12 | 0.77±0.15 | 0.03±0.05 |  | 0.125±0.25 |
| Margalef Index | 0.15±0.18 | 0.04±0.06 | 0.60±0.23 | 0.28±0.33 | 0.66±0.17 | 0.70±0.38 | 0.03±0.04 |  | 0.023±0.05 |

**Table S3.** One-way analysis of similarities (ANOSIM), showing differences in cyanobacteria communities between different months and sites.

|  | **Global R value** | **Pairwise comparison**  **(*p* < 0.05)** | **Significance level** |
| --- | --- | --- | --- |
| Lake | 0.6283 | All month | *P*<0.01 |
| Ponds | 0.3168 | 5 vs. 2; 8 vs. 2; 11 vs. 2 | *P*<0.01 |
| May | 0.3108 | Pond vs. Lake | *P*<0.05 |
| Aug | 0.6548 | Pond vs. Lake | *P*<0.01 |
| Nov | 0.1138 | Pond vs. Lake | *P*<0.05 |
| Feb | 0.2698 | Pond vs. Lake | *P*<0.05 |

## 3.4 Relationships between cyanobacteria species and environmental variables

**Table S4.** Summary of redundancy analysis between environmental factors and cyanobacterial abundance in Lake Guchenghu and adjacent mitten crab ponds.

|  | **Lake Guchenghu** | | **Ponds** | |
| --- | --- | --- | --- | --- |
| **Axes** | **1** | **2** | **1** | **2** |
| Eigenvalues | 0.356 | 0.136 | 0.562 | 0.379 |
| Species-environment correlations | 0.891 | 0.890 | 1.000 | 1.000 |
| Cumulative percentage variance  of species data | 30.3 | 41.8 | 32.6 | 54.6 |
| Cumulative percentage variance  of species-environment relation | 51.4 | 71.0 | 32.6 | 54.6 |
| Sum of all eigenvalues | 1.177 |  | 1.723 |  |
| Sum of all canonical eigenvalues | 0.693 |  | 1.723 |  |

**Table S5.** The correlation matrix between RDA axes and environmental factors in Lake Guchenghu from May 2017 to February 2018.

|  | | **Axis1** | | **Axis2** | | **Axis3** | | **Axis4** | |
| --- | --- | --- | --- | --- | --- | --- | --- | --- | --- |
| pH | -0.2158 | | -0.5026 | | -0.3664 | | 0.1255 | |
| WT | -0.1557 | | -0.3644 | | -0.6030 | | 0.0010 | |
| DO | 0.1196 | | -0.0784 | | 0.5161 | | 0.1200 | |
| Turb | -0.6012 | | -0.1356 | | -0.1313 | | -0.0829 | |
| WD | -0.5946 | | 0.0174 | | 0.1411 | | -0.0879 | |
| NO2-N | -0.3037 | | -0.5763 | | 0.1983 | | -0.1923 | |
| NO3-N | 0.2506 | | -0.4813 | | 0.3850 | | 0.0406 | |
| NH4-N | -0.1706 | | 0.3613 | | 0.2702 | | -0.3915 | |
| TN | -0.2433 | | -0.0881 | | 0.5018 | | -0.3248 | |
| TP | -0.2507 | | 0.5969 | | 0.0041 | | -0.2489 | |
| N/P | 0.3576 | | -0.5695 | | 0.0729 | | 0.2041 | |
| COD | 0.3692 | | 0.6287 | | 0.1013 | | -0.1078 | |

**Table S6.** The correlation matrix between RDA axes and environmental factors in mitten crab ponds from May 2017 to February 2018

|  | **Axis1** | **Axis2** | **Axis3** | **Axis4** |
| --- | --- | --- | --- | --- |
| pH | 0.8045 | 0.1937 | -0.1589 | -0.3469 |
| WT | 0.5996 | 0.2274 | -0.6593 | 0.0165 |
| DO | 0.0464 | 0.3445 | -0.2449 | 0.1706 |
| Turb | -0.3007 | -0.1047 | 0.2847 | 0.2265 |
| WD | 0.3018 | 0.1715 | -0.3311 | -0.3897 |
| NO2-N | 0.3848 | -0.2930 | -0.0326 | -0.3205 |
| NO3-N | 0.2644 | -0.1335 | 0.5568 | 0.0743 |
| NH4-N | -0.3360 | -0.1851 | 0.3865 | -0.5790 |
| TN | 0.0835 | 0.0214 | 0.1079 | -0.4510 |
| TP | -0.5072 | 0.1166 | -0.0501 | 0.4260 |
| N/P | 0.6503 | -0.1523 | 0.1958 | -0.6584 |
| COD | 0.4139 | -0.0409 | -0.0639 | -0.3031 |

**Table S7.** Results of Pearson correlation between dominant cyanobacteria species and environmental parameters in Lake Guchenghu and adjacent mitten crab ponds

|  | **Dominant species** | **WT** | **pH** | **WD** | **Turb** | **NH4-N** | **NO2-N** | **NO3-N** | **COD** | **TN** | **TP** | **N:P** |
| --- | --- | --- | --- | --- | --- | --- | --- | --- | --- | --- | --- | --- |
| Lake | *Merismopedia* | 0.129 | 0.145 | -0.698** | -0.358* | -0.358* | -0.352* | -0.124 | 0.230 | -0.275 | -0.381* | 0.349* |
|  | *Oscillatoria* | 0.362* | 0.352* | 0.163 | 0.466** | 0.053 | -0.067 | -0.292 | -0.222 | -0.132 | 0.352* | -0.387* |
|  | *Dolichospermum* | 0.607** | 0.663** | 0.200 | 0.469** | -0.276 | 0.129 | -0.226 | -0.654** | -0.150 | -0.101 | -0.194 |
|  | *Pseudanabaena* | 0.215 | 0.228 | -0.006 | 0.170 | -0.209 | 0.059 | -0.102 | -0.109 | -0.045 | 0.137 | -0.119 |
|  | *Raphidiopsis* | 0.016 | -0.037 | 0.002 | 0.178 | 0.005 | -0.189 | -0.188 | 0.255 | -0.068 | 0.472** | -0.281 |
|  | Cyanobacteria | 0.292 | 0.306 | -0.698** | -0.217 | -0.439** | -0.385* | -0.237 | 0.154 | -0.345* | 0.394* | 0.247 |
| Ponds | *Pesudanabaena* | 0.232 | 0.091 | 0.238 | -0.114 | -0.060 | -0.022 | -0.173 | 0.110 | 0.071 | 0.041 | -0.119 |
|  | *Cylindrospermopsis* | 0.216 | 0.080 | 0.228 | -0.117 | -0.055 | -0.016 | -0.176 | 0.114 | 0.074 | 0.044 | -0.116 |
|  | *Planktolyngbya* | -0.080 | -0.519* | -0.021 | 0.383 | -0.126 | -0.225 | -0.248 | -0.578* | -0.039 | 0.719** | -0.389 |
|  | *Aphanizomenon* | -0.039 | -0.332 | 0.140 | 0.288 | -0.061 | -0.126 | -0.180 | -0.546* | 0.146 | 0.630** | -0.237 |
|  | *Oscillatoria* | 0.349 | 0.153 | 0.141 | -0.020 | -0.124 | -0.065 | -0.212 | -0.109 | -0.152 | 0.292 | -0.319 |
|  | Cyanobacteria | 0.269 | 0.118 | 0.266 | -0.100 | -0.074 | -0.031 | -0.189 | 0.071 | 0.043 | 0.033 | -0.131 |

* *P* ＜0.05；** *P* ＜0.01
